# Supplementary material
Source: HighWire-hosted journal article supplement (https://www.jpn.ca/highwire/filestream/89774/field_highwire_adjunct_files/0/jpn-130275-1-at.pdf)
Supplement: jpn-130275-1-at.pdf [file jpn-130275-1-at.pdf]

**Appendix 1** to Du M, Liu J, Chen Z, et al. Brain grey matter volume alterations in late-life depression: a meta-analysis. *J Psychiatry Neurosci* 2014

DOI: 10.1503/jpn.130275

Copyright © 2014 The Author(s) or their employer(s). To receive this resource in an accessible format, please contact us at [cmajgroup@cmaj.ca](mailto:cmajgroup@cmaj.ca).

**Table S1: Imaging methodology quality assessment checklist (when criteria were partially met, 0.5 points were assigned)**

| Category                                                                                                                                                                         | Score (0/0.5/1) |
|----------------------------------------------------------------------------------------------------------------------------------------------------------------------------------|-----------------|
| Category 1: Samples                                                                                                                                                              |                 |
| 1 Patients were evaluated prospectively, specific diagnostic criteria were applied, and demographic data were reported                                                           |                 |
| 2 Healthy controls were evaluated prospectively, psychiatric and medical illnesses were excluded                                                                                 |                 |
| 3 Important variables (e.g. age, sex, illness duration, onset time, medication status, comorbidity, severity of illness) were checked, either by stratification or statistically |                 |
| 4 Sample size per group > 10                                                                                                                                                     |                 |
| Category 2: Methods for image acquisition and analysis                                                                                                                           |                 |
| 5 Magnet strength at least 1.5 T                                                                                                                                                 |                 |
| 6 MRI slice thickness $\leq$ 3 mm                                                                                                                                                |                 |
| 7 Whole brain analysis was automated with no a priori regional selection                                                                                                         |                 |
| 8 Coordinates reported in a standard space                                                                                                                                       |                 |
| 9 The imaging technique used was clearly described so that it could be reproduced                                                                                                |                 |
| 10 Measurements were clearly described so that they could be reproduced                                                                                                          |                 |
| Category 3: Results and conclusions                                                                                                                                              |                 |
| 11 Statistical parameters for significant, and important nonsignificant differences were provided                                                                                |                 |
| 12 Conclusions were consistent with the results obtained and the limitations were discussed                                                                                      |                 |
| TOTAL                                                                                                                                                                            | /12             |
